# Supplementary material
Source: PubMed Central journal article supplement (PMC4531279)
Supplement: peds.2013-4147_peds.2013-4147SupplementaryData.pdf [file peds.2013-4147_peds.2013-4147SupplementaryData.pdf]

# Supplemental Information

Q1. The list of codes evaluated and categorized into the three categories of Information Loss, Overlapping Categories, and Inconsistent are provided.

The ICD-9-CM codes are provided without the decimal point, (normally after the third digit) as is routine for files interfacing with computer sys-

tems. The text to the right of each code is the description provided by the Center for Medicaid and Medicare Services.

| Information Loss |                                                                                                                                            |
|------------------|--------------------------------------------------------------------------------------------------------------------------------------------|
| 436              | Acute, but ill-defined cerebrovascular disease                                                                                             |
| 5111             | Pleurisy with effusion, with mention of a bacterial cause other than tuberculosis                                                          |
| 5173             | Acute chest syndrome                                                                                                                       |
| 5362             | Persistent vomiting                                                                                                                        |
| 5778             | Other specified diseases of pancreas                                                                                                       |
| 6242             | Hypertrophy of clitoris                                                                                                                    |
| 7135             | Arthropathy associated with neurological disorders                                                                                         |
| 7226             | Degeneration of intervertebral disc, site unspecified                                                                                      |
| 7685             | Severe birth asphyxia                                                                                                                      |
| 7686             | Mild or moderate birth asphyxia                                                                                                            |
| 8290             | Fracture NOS-closed                                                                                                                        |
| 8920             | Open wound of foot except toe(s) alone, without mention of complication                                                                    |
| 9110             | Abrasion or friction burn of trunk, without mention of infection                                                                           |
| 9301             | Foreign body in conjunctival sac                                                                                                           |
| 9595             | Other and unspecified injury to finger                                                                                                     |
| 34580            | Other forms of epilepsy, without mention of intractable epilepsy                                                                           |
| 36202            | Proliferative diabetic retinopathy                                                                                                         |
| 37621            | Thyrotoxic exophthalmos                                                                                                                    |
| 37622            | Exophthalmic ophthalmoplegia                                                                                                               |
| 37992            | Swelling or mass of eye                                                                                                                    |
| 41400            | Coronary atherosclerosis of unspecified type of vessel, native or graft                                                                    |
| 47820            | Disease of pharynx NOS                                                                                                                     |
| 63592            | Threatened abortion, delivered                                                                                                             |
| 64001            | Hemorrhage from placenta previa, with delivery                                                                                             |
| 64813            | Thyroid dysfunction, antepartum                                                                                                            |
| 64851            | Congenital cardiovascular disorders of mother, with delivery                                                                               |
| 65281            | Other specified malposition or malpresentation, delivered                                                                                  |
| 65583            | Other known or suspected fetal abnormality, not elsewhere classified, affecting management of mother, antepartum condition or complication |
| 68101            | Felon                                                                                                                                      |
| 71592            | Osteoarthritis, unspecified whether generalized or localized, involving upper arm                                                          |
| 71598            | Osteoarthritis, unspecified whether generalized or localized, involving other specified sites                                              |
| 71696            | Arthropathy unspecified, involving lower leg                                                                                               |
| 71697            | Arthropathy unspecified, involving ankle and foot                                                                                          |
| 73025            | Unspecified osteomyelitis involving pelvic region and thigh                                                                                |
| 73026            | Unspecified osteomyelitis involving lower leg                                                                                              |
| 73027            | Unspecified osteomyelitis involving ankle and foot                                                                                         |
| 74510            | Complete transposition of great vessels                                                                                                    |
| 74782            | Congenital anomaly of spinal vessel                                                                                                        |
| 75613            | Absence of vertebra, congenital                                                                                                            |
| 76493            | Fetal growth retardation, unspecified, 750-999 grams                                                                                       |
| 76499            | Fetal growth retardation, unspecified, 2,500+ grams                                                                                        |
| 76519            | Other preterm infants, 2,500+ grams                                                                                                        |
| 87362            | Open wound of gum (alveolar process), uncomplicated                                                                                        |
| 87369            | Open wound of internal structure of mouth, other and multiple sites, uncomplicated                                                         |
| 99678            | Other complications due to other internal orthopedic device, implant, and graft                                                            |
| 99739            | Other respiratory complications                                                                                                            |
| E8498            | Accidents occurring in other specified places                                                                                              |
| E857             | Accidental poisoning by other anti-infectives                                                                                              |
| V035             | Need for prophylactic vaccination and inoculation against diphtheria alone                                                                 |
| V0381            | Need for prophylactic vaccination against Hemophilus influenza, type B [Hib]                                                               |
| V0382            | Need for prophylactic vaccination against Streptococcus pneumoniae [pneumococcus]                                                          |
| V040             | Need for prophylactic vaccination and inoculation against poliomyelitis                                                                    |
| V0481            | Need for prophylactic vaccination and inoculation against influenza                                                                        |
| V0482            | Need for prophylactic vaccination and inoculation against respiratory syncytial virus (RSV)                                                |
| V053             | Need for prophylactic vaccination and inoculation against viral hepatitis                                                                  |
| V054             | Need for prophylactic vaccination and inoculation against varicella                                                                        |
| V058             | Need for prophylactic vaccination and inoculation against other specified disease                                                          |
| V061             | Need for prophylactic vaccination with combined diphtheria-tetanus-pertussis [DTP] [DTaP] vaccine                                          |
| V063             | Need for prophylactic vaccination with diphtheria-tetanus-pertussis with poliomyelitis (DTP + polio) vaccine                               |
| V064             | Need for prophylactic vaccination with measles-mumps-rubella [MMR] vaccine                                                                 |
| V065             | Need for prophylactic vaccination and inoculation with Tetanus-diphtheria [Td] [DT                                                         |
| V066             | Need for prophylactic vaccination and inoculation against Streptococcus pneumoniae [pneumococcus] and influenza                            |
| V069             | Need for prophylactic vaccination with unspecified combined vaccine                                                                        |
| V113             | Personal history of alcoholism                                                                                                             |
| V1329            | Personal history of other genital system and obstetric disorders                                                                           |
| V151             | Personal history of surgery to heart and great vessels, presenting hazards to health                                                       |
| V474             | Other urinary problems                                                                                                                     |
| V491             | Mechanical problems with limbs                                                                                                             |
| V6123            | Cnsl prnt-biol child prob                                                                                                                  |
| V6543            | Counseling on injury prevention                                                                                                            |
| V702             | General psychiatric examination, other and unspecified                                                                                     |
| V7102            | Observation for childhood or adolescent antisocial behavior                                                                                |
| V711             | Observation for suspected malignant neoplasm                                                                                               |
| V7398            | Screening examination for unspecified chlamydial disease                                                                                   |
| V740             | Screening examination for cholera                                                                                                          |
| V746             | Screening examination for yaws                                                                                                             |
| V770             | Screening for thyroid disorders                                                                                                            |
| V780             | Screening for iron deficiency anemia                                                                                                       |
| V781             | Screening for other and unspecified deficiency anemia                                                                                      |
| V810             | Screening for ischemic heart disease                                                                                                       |
| 2801             | Iron deficiency anemia secondary to inadequate dietary iron intake                                                                         |
| 9190             | Abrasion or friction burn of other, multiple, and unspecified sites, without mention of infection                                          |
| 28261            | Hb-S5 disease without crisis                                                                                                               |
| 30480            | Combinations of drug dependence excluding opioid type drug, unspecified use                                                                |
| 38583            | Retained foreign body of middle ear                                                                                                        |
| 64941            | Epilepsy complicating pregnancy, childbirth, or the puerperium, delivered, with or without mention of antepartum condition                 |
| 71691            | Arthropathy, unspecified, involving shoulder region                                                                                        |
| V778             | Screening for obesity                                                                                                                      |

| Overlapping Categories |                                                                                                                                                                        |
|------------------------|------------------------------------------------------------------------------------------------------------------------------------------------------------------------|
| 932                    | Foreign body in nose                                                                                                                                                   |
| 2511                   | Other specified hypoglycemia                                                                                                                                           |
| 2727                   | Lipidoses                                                                                                                                                              |
| 2980                   | Depressive type psychosis                                                                                                                                              |
| 3572                   | Polyneuropathy in diabetes                                                                                                                                             |
| 4779                   | Allergic rhinitis NOS                                                                                                                                                  |
| 7246                   | Disorders of sacrum                                                                                                                                                    |
| 7707                   | Chronic respiratory disease arising in the perinatal period                                                                                                            |
| 8064                   | Closed fracture of lumbar spine with spinal cord injury                                                                                                                |
| 8832                   | Open wound of fingers, with tendon involvement                                                                                                                         |
| 9151                   | Abrasion or friction burn of fingers, infected                                                                                                                         |
| 9179                   | Other and unspecified superficial injury of foot and toes, infected                                                                                                    |
| 9331                   | Foreign body in larynx                                                                                                                                                 |
| 9593                   | Other and unspecified injury to elbow, forearm, and wrist                                                                                                              |
| 9663                   | Poisoning by other and unspecified anticonvulsants                                                                                                                     |
| 9848                   | Toxic effect of other lead compounds                                                                                                                                   |
| 9895                   | Toxic effect of venom                                                                                                                                                  |
| 20288                  | Other malignant lymphomas involving lymph nodes of multiple sites                                                                                                      |
| 23879                  | Other lymphatic and hematopoietic tissues                                                                                                                              |
| 25013                  | type I diabetes mellitus [juvenile type], uncontrolled, with ketoacidosis                                                                                              |
| 25050                  | Diabetes mellitus type II [non-insulin dependent type] [NIDDM type] [adult-onset type] or unspecified type, not stated as uncontrolled, with ophthalmic manifestations |
| 25052                  | Diabetes mellitus type I [non-insulin dependent type] [NIDDM type] [adult-onset type] or unspecified type, uncontrolled, with ophthalmic manifestations                |
| 25053                  | Diabetes mellitus type I [juvenile type], uncontrolled, with ophthalmic manifestations                                                                                 |
| 25541                  | Glucocorticoid deficiency                                                                                                                                              |
| 27789                  | Other specified disorders of metabolism                                                                                                                                |
| 29289                  | Other specified drug-induced mental disorders                                                                                                                          |
| 31401                  | Attention deficit disorder of childhood with hyperactivity                                                                                                             |
| 41511                  | Iatrogenic pulmonary embolism and infarction                                                                                                                           |
| 43400                  | Cerebral thrombosis, without mention of cerebral infarction                                                                                                            |
| 59389                  | Urethritis NOS                                                                                                                                                         |
| 60889                  | Legally induced abortion, complete, without mention of complication                                                                                                    |
| 64111                  | Premature separation of placenta, with delivery                                                                                                                        |
| 64121                  | Unspecified antepartum hemorrhage, antepartum                                                                                                                          |
| 64201                  | Benign essential hypertension antepartum                                                                                                                               |
| 64231                  | Transient hypertension of pregnancy, antepartum                                                                                                                        |
| 64233                  | Mild or unspecified pre-eclampsia, with delivery                                                                                                                       |
| 64241                  | Severe pre-eclampsia, with delivery                                                                                                                                    |
| 64251                  | Severe pre-eclampsia, postpartum                                                                                                                                       |
| 64611                  | Edema or excessive weight gain in pregnancy, with delivery, with or without mention of antepartum complication                                                         |
| 64613                  | Edema or excessive weight gain, antepartum                                                                                                                             |
| 64683                  | Other specified complication, antepartum                                                                                                                               |
| 64701                  | Syphilis of mother, complicating pregnancy, with delivery                                                                                                              |
| 64721                  | Other venereal diseases of mother, with delivery, with or without mention of antepartum condition                                                                      |
| 64801                  | Diabetes mellitus of mother, with delivery                                                                                                                             |
| 64861                  | Other cardiovascular diseases of mother, with delivery                                                                                                                 |
| 64881                  | Abnormal glucose tolerance of mother, with delivery                                                                                                                    |
| 64891                  | Other current conditions classifiable elsewhere of mother, with delivery                                                                                               |
| 64893                  | Other current conditions classifiable elsewhere of mother, antepartum                                                                                                  |
| 64894                  | Other current conditions classifiable elsewhere of mother, postpartum                                                                                                  |
| 64931                  | Coagulation defects complicating pregnancy, childbirth, or the puerperium, delivered, with or without mention of antepartum condition                                  |
| 64943                  | Epilepsy complicating pregnancy, childbirth, or the puerperium, antepartum condition or complication                                                                   |
| 64961                  | Uterine size date discrepancy, delivered, with or without mention of antepartum condition                                                                              |
| 65411                  | Tumors of body of uterus, with delivery                                                                                                                                |
| 65443                  | Other abnormalities in shape or position of gravid uterus and of neighboring structures, antepartum                                                                    |
| 65492                  | Other and unspecified abnormality of organs and soft tissues of pelvis, delivered, with mention of postpartum complication                                             |
| 65651                  | Poor fetal growth, affecting management of mother, delivered                                                                                                           |
| 65681                  | Other specified fetal and placental problems, affecting management of mother, delivered                                                                                |
| 65811                  | Premature rupture of membranes, delivered                                                                                                                              |
| 65821                  | Delayed delivery after spontaneous or unspecified rupture of membranes, delivered                                                                                      |
| 65961                  | Other advanced maternal age, delivered, with or without mention of antepartum condition                                                                                |
| 66702                  | Retained placenta without hemorrhage, with delivery, with mention of postpartum complication                                                                           |
| 67181                  | Other venous complications, with delivery, with or without mention of antepartum condition                                                                             |
| 67803                  | Fetal hematologic conditions, antepartum condition or complication                                                                                                     |
| 71108                  | Pyogenic arthritis involving other specified sites                                                                                                                     |
| 73349                  | Aseptic necrosis of other bone sites                                                                                                                                   |
| 78079                  | Other malaise and fatigue                                                                                                                                              |
| 78499                  | Other symptoms involving head and neck                                                                                                                                 |
| 78609                  | Other dyspnea and respiratory abnormality                                                                                                                              |
| 78659                  | Other chest pain                                                                                                                                                       |
| 78703                  | Vomiting alone                                                                                                                                                         |
| 78791                  | Diarrhea                                                                                                                                                               |
| 95709                  | Other nervous system complications                                                                                                                                     |
| 99811                  | Hemorrhage complicating a procedure                                                                                                                                    |
| V2389                  | Other high-risk pregnancy                                                                                                                                              |
| V679                   | Unspecified follow-up examination                                                                                                                                      |
| V705                   | Health examination of defined subpopulations                                                                                                                           |
| V7231                  | Routine gynecological examination                                                                                                                                      |
| V748                   | Screening examination for other specified bacterial and spirochetal diseases                                                                                           |
| 2168                   | Benign neoplasm of other specified sites of skin                                                                                                                       |
| 3159                   | Unspecified delay in development                                                                                                                                       |
| 3418                   | Other demyelinating diseases of central nervous system                                                                                                                 |
| 5289                   | Other and unspecified diseases of the oral soft tissues                                                                                                                |
| 5719                   | Unspecified chronic liver disease without mention of alcohol                                                                                                           |
| 6248                   | Other specified noninflammatory disorders of vulva and perineum                                                                                                        |
| 7098                   | Other specified disorders of skin                                                                                                                                      |
| 9177                   | Superficial foreign body (splinter) of foot and toe(s), without major open wound, infected                                                                             |
| 9594                   | Other and unspecified injury to hand, except finger                                                                                                                    |
| 9840                   | Toxic effect of inorganic lead compounds                                                                                                                               |
| 20380                  | Other immunoproliferative neoplasms without mention of having achieved remission                                                                                       |
| 28989                  | Other specified diseases of blood and blood-forming organs                                                                                                             |
| 31239                  | Other disorders of impulse control                                                                                                                                     |
| 41519                  | Other pulmonary embolism and infarction                                                                                                                                |
| 51909                  | Dental caries extending into pulp                                                                                                                                      |
| 52800                  | Stomatitis and mucositis, unspecified                                                                                                                                  |
| 64223                  | Transient hypertension of pregnancy, with delivery                                                                                                                     |
| 64254                  | Pre-eclampsia or eclampsia superimposed on pre-existing hypertension, with delivery                                                                                    |
| 64291                  | Edema or excessive weight gain in pregnancy, with delivery, with mention of postpartum complication                                                                    |
| 64612                  | Other specified complications of pregnancy, with delivery, with mention of postpartum complication                                                                     |
| 64682                  | Drug dependence of mother, with delivery                                                                                                                               |
| 64831                  | Other complications of labor and delivery, delivered, with or without mention of antepartum condition                                                                  |
| 66981                  | Other venous complications, with delivery, with mention of postpartum complication                                                                                     |
| 67182                  | Other joint derangement, not elsewhere classified, involving lower leg                                                                                                 |
| 71886                  | Other specified disorders of bursae and tendons in shoulder region                                                                                                     |
| 72619                  | Congenital dislocation of knee (with genu recurvatum)                                                                                                                  |
| 75441                  | Other specified congenital anomalies of skin                                                                                                                           |
| 75739                  | Extreme immaturity, unspecified [weight]                                                                                                                               |
| 76500                  | Extreme immaturity, 2,500+ grams                                                                                                                                       |
| 76509                  | Other nonspecific positive culture findings                                                                                                                            |
| 79539                  | History of contact with and (suspected) exposure to potentially hazardous body fluids                                                                                  |
| V1585                  | Observation for suspected infectious condition                                                                                                                         |
| V259                   | Other mental problems                                                                                                                                                  |
| V402                   | Problems with sight                                                                                                                                                    |
| V410                   | Family circumstances NEC                                                                                                                                               |
| V618                   | Other specified general medical examinations                                                                                                                           |
| V708                   | Other specified general medical examinations                                                                                                                           |

| Inconsistent |                                                                                                                   |
|--------------|-------------------------------------------------------------------------------------------------------------------|
| 2776         | Other deficiencies of circulating enzymes                                                                         |
| 3079         | Other and unspecified special symptoms or syndromes, not elsewhere classified                                     |
| 6819         | Cellulitis and abscess of unspecified digit                                                                       |
| 6823         | Cellulitis and abscess of upper arm and forearm                                                                   |
| 6943         | Impetigo herpetiformis                                                                                            |
| 7952         | Nonspecific abnormal findings on chromosomal analysis                                                             |
| 9460         | Burns of multiple specified sites, unspecified degree                                                             |
| 9462         | Blisters with epidermal loss due to burn [second degree] of multiple specified sites                              |
| 20088        | Other named variants of lymphosarcoma and reticulosarcoma involving lymph nodes of multiple sites                 |
| 29980        | Other specified early childhood psychoses, current or active state                                                |
| 30922        | Emancipation disorder                                                                                             |
| 31400        | Attention deficit disorder of childhood without mention of hyperactivity                                          |
| 53510        | Unspecified ventral hernia without mention of obstruction or gangrene                                             |
| 65461        | Other congenital or acquired abnormality of cervix, with delivery                                                 |
| 65841        | Infection of amniotic cavity, delivered                                                                           |
| 68100        | Cellulitis, finger NOS                                                                                            |
| 68110        | Cellulitis, toe NOS                                                                                               |
| 74100        | With hydrocephalus, spina bifida, unspecified region                                                              |
| 78604        | Cheyne-Stokes respiration                                                                                         |
| 99590        | SIRS, NOS                                                                                                         |
| E856         | Accidental poisoning by antibiotics                                                                               |
| V1529        | Personal history of surgery to other organs, presenting hazards to health                                         |
| V218         | Other specified constitutional states in development                                                              |
| V298         | Observation for other specified suspected condition                                                               |
| V727         | Diagnostic skin and sensitization tests                                                                           |
| V742         | Screening examination for leprosy [Hansen's disease]                                                              |
| 3061         | Respiratory malfunction arising from mental factors                                                               |
| 4150         | Acute cor pulmonale                                                                                               |
| 5722         | Hepatic encephalopathy                                                                                            |
| 6208         | Other noninflammatory disorders of ovary, fallopian tube, and broad ligament                                      |
| 6826         | Cellulitis and abscess of leg, except foot                                                                        |
| 6827         | Cellulitis and abscess of foot, except toes                                                                       |
| 9351         | Foreign body in esophagus                                                                                         |
| 64892        | Other current conditions classifiable elsewhere of mother, with delivery, with mention of postpartum complication |
| 66704        | Retained placenta without hemorrhage, postpartum condition or complication                                        |
| 68102        | Onychia and paronychia of finger                                                                                  |
| 68111        | Onychia and paronychia of toe                                                                                     |
| 75552        | Congenital elevation of scapula                                                                                   |
| 78060        | Fever NOS                                                                                                         |
| 99701        | Central nervous system complication                                                                               |
| E9289        | Accident NOS                                                                                                      |
| V072         | Need for prophylactic immunotherapy                                                                               |
